# Supplementary material for: Ontogeny of the Middle-Ear Air-Sinus System in Alligator mississippiensis (Archosauria: Crocodylia)
Source: PubMed Central journal article supplement (PMC4580574; doi:10.1371/journal.pone.0137060), 2015-09-23

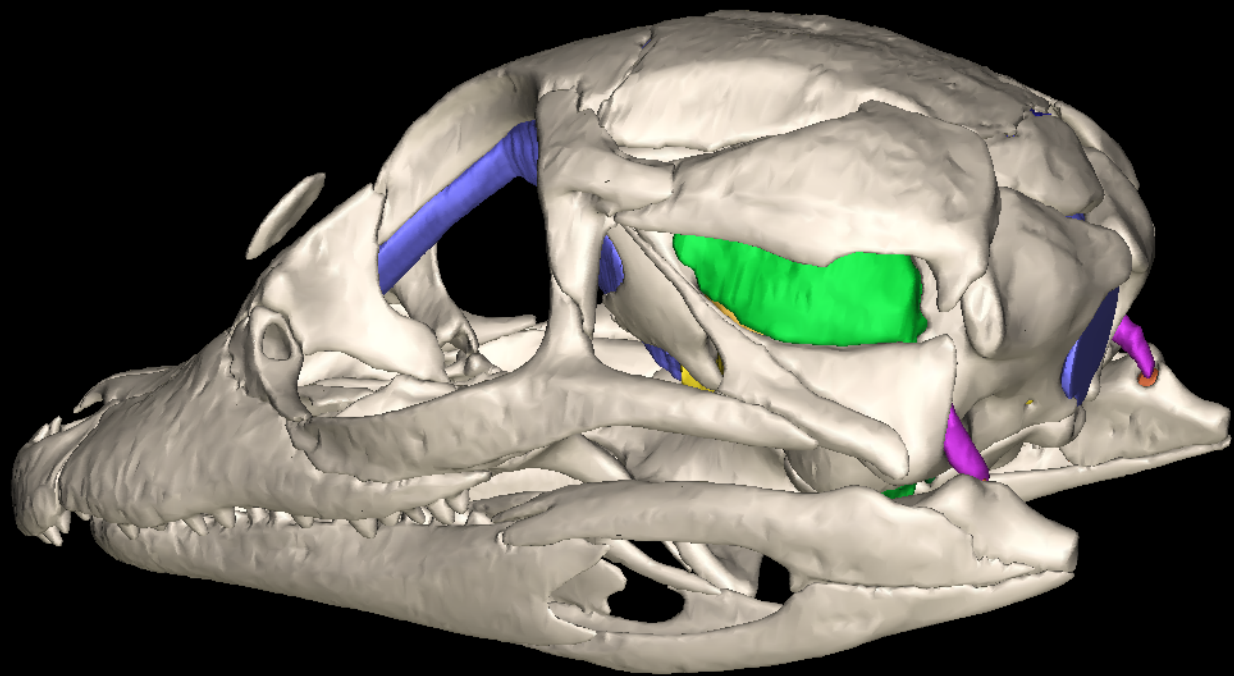

Supplement: pone.0137060.s001.pdf [file pone.0137060.s001.pdf]
